# Supplementary material for: Treatment and surveillance for non-muscle-invasive bladder cancer: a clinical practice guideline (2021 edition)
Source: PubMed Central journal article supplement (PMC9382792; doi:10.1186/s40779-022-00406-y), 2022-08-17
Supplement: 40779_2022_406_MOESM3_ESM.pdf [file 40779_2022_406_MOESM3_ESM.pdf]

**Table S1** Meta-analysis results of chemotherapy drug subgroup

| Drug                                | Subgroup          | Outcome [RR (95%CI)]                         |                       |                       |                       |                      |                         |                       |                       |                       |                      |                       |
|-------------------------------------|-------------------|----------------------------------------------|-----------------------|-----------------------|-----------------------|----------------------|-------------------------|-----------------------|-----------------------|-----------------------|----------------------|-----------------------|
|                                     |                   | Recurrence rate                              |                       |                       |                       |                      | Bladder irritation sign | Hematuria             | Cystitis              | Fever                 | Allergy              |                       |
|                                     |                   | 1-year                                       | 2-year                | 3-year                | 4-year                | 5-year               |                         |                       |                       |                       |                      |                       |
| Gemcitabine vs. Pirarubicin         | Dosage (mg)       | 1000 vs. 30 – 50                             | 0.51<br>(0.33, 0.77)* | 0.59<br>(0.48, 0.73)* | 0.51<br>(0.31, 0.84)* | NA                   | NA                      | 0.52<br>(0.42, 0.64)* | 0.38<br>(0.24, 0.58)* | 0.35<br>(0.14, 0.86)* | 1.28<br>(0.62, 2.65) | 0.42<br>(0.14, 1.26)  |
|                                     |                   | 1000 vs. < 30                                | 0.13<br>(0.02, 0.95)* | 0.46<br>(0.17, 1.19)  | NA                    | NA                   | NA                      | NA                    | NA                    | NA                    | NA                   | NA                    |
|                                     |                   | < 1000 vs. 30 - 50                           | 1.35<br>(0.57, 3.17)  | 0.64<br>(0.29, 1.42)  | NA                    | NA                   | NA                      | 0.50<br>(0.15, 1.65)  | 0.16<br>(0.04, 0.61)* | NA                    | 0.25<br>(0.06, 1.10) | 0.50<br>(0.05, 5.23)  |
|                                     |                   | > 1000 vs. 30 – 50                           | NA                    | 0.39<br>(0.16, 0.95)* | NA                    | NA                   | NA                      | 0.84<br>(0.41, 1.72)  | NA                    | NA                    | NA                   | NA                    |
|                                     | Medication scheme | SIC in both groups                           | NA                    | NA                    | 0.41<br>(0.20, 0.83)* | NA                   | NA                      | 0.67<br>(0.14, 3.30)  | 0.08<br>(0.01, 0.56)* | NA                    | 1.83<br>(0.76, 4.43) | NA                    |
|                                     |                   | SIC + induction + maintenance in both groups | 0.47<br>(0.28, 0.80)* | 0.58<br>(0.46, 0.72)* | 0.83<br>(0.29, 2.41)  | NA                   | NA                      | 0.50<br>(0.38, 0.67)* | 0.41<br>(0.24, 0.67)* | 0.35<br>(0.14, 0.86)* | 0.41<br>(0.15, 1.15) | 0.33<br>(0.10, 1.03)  |
|                                     |                   | Induction only in both groups                | 1.25<br>(0.37, 4.26)  | NA                    | NA                    | NA                   | NA                      | 0.20<br>(0.03, 1.62)  | 0.33<br>(0.04, 3.05)  | NA                    | NA                   | NA                    |
|                                     |                   | Induction + maintenance in both groups       | 0.63<br>(0.31, 1.30)  | 0.59<br>(0.41, 0.85)* | 0.51<br>(0.19, 1.37)  | NA                   | NA                      | 0.60<br>(0.43, 0.83)* | 0.29<br>(0.13, 0.69)* | NA                    | 0.34<br>(0.01, 8.14) | 1.00<br>(0.07, 15.43) |
| Pirarubicin vs. Hydroxycamptothecin | Dosage (mg)       | 30 – 50 vs. > 20                             | NA                    | 4.00<br>(0.92, 17.35) | NA                    | NA                   | NA                      | NA                    | NA                    | NA                    | NA                   | NA                    |
|                                     |                   | 30 – 50 vs. 10 – 20                          | 0.79<br>(0.58, 1.07)  | 0.75<br>(0.57, 0.99)* | 0.84<br>(0.37, 1.91)  | 0.92<br>(0.44, 1.95) | 0.73<br>(0.43, 1.23)    | 1.39<br>(1.14, 1.70)* | 0.99<br>(0.60, 1.62)  | NA                    | NA                   | NA                    |

|                             |                   |                                              |                       |                       |                        |                      |                      |                       |                        |                        |    |    |
|-----------------------------|-------------------|----------------------------------------------|-----------------------|-----------------------|------------------------|----------------------|----------------------|-----------------------|------------------------|------------------------|----|----|
|                             | Medication scheme | Induction + maintenance in both groups       | 0.72<br>(0.46, 1.13)  | 0.75<br>(0.51, 1.10)  | 0.84<br>(0.37, 1.91)   | 0.92<br>(0.44, 1.95) | 0.73<br>(0.43, 1.23) | 1.40<br>(1.09, 1.79)* | 1.19<br>(0.56, 2.53)   | NA                     | NA | NA |
|                             |                   | SIC +induction+ maintenance in both groups   | 0.85<br>(0.55, 1.32)  | 0.95<br>(0.59, 1.53)  | NA                     | NA                   | NA                   | 1.38<br>(0.94, 2.02)  | 0.85<br>(0.43, 1.65)   | NA                     | NA | NA |
| Pirarubicin vs. mitomycin-C | Dosage (mg)       | 30 vs. 20                                    | 0.40<br>(0.23, 0.69)* | 0.42<br>(0.28, 0.63)* | 0.57<br>(0.23, 1.45)§  | NA                   | 0.16<br>(0.02, 1.29) | 0.62<br>(0.32, 1.20)  | 0.32<br>(0.09, 1.13)   | 0.94<br>(0.37, 2.39) § | NA | NA |
|                             |                   | 30 vs. 30                                    | 0.33<br>(0.11, 0.98)* | 0.54<br>(0.33, 0.90)* | NA                     | NA                   | NA                   | 0.46<br>(0.28, 0.75)* | 0.99<br>(0.14, 7.23) § | NA                     | NA | NA |
|                             |                   | 30 vs. 40                                    | 0.66<br>(0.42, 1.03)  | 0.35<br>(0.21, 0.57)* | NA                     | NA                   | NA                   | 0.76<br>(0.51, 1.12)  | 0.59<br>(0.28, 1.24)   | NA                     | NA | NA |
|                             |                   | 40 vs. 40                                    | 0.31<br>(0.09, 1.11)  | 0.53<br>(0.34, 0.82)* | 0.64<br>(0.31, 1.34)   | NA                   | NA                   | 0.58<br>(0.35, 0.94)* | 0.20<br>(0.02, 1.65)   | NA                     | NA | NA |
|                             | Medication scheme | Induction only in both groups                | 0.25<br>(0.03, 2.11)  | NA                    | NA                     | NA                   | NA                   | NA                    | 0.33<br>(0.04, 3.03)   | NA                     | NA | NA |
|                             |                   | Induction + maintenance in both groups       | 0.54<br>(0.37, 0.80)* | 0.44<br>(0.33, 0.57)* | 0.57<br>(0.23, 1.45) § | NA                   | NA                   | 0.61<br>(0.43, 0.87)* | 0.55<br>(0.27, 1.12)   | NA                     | NA | NA |
|                             |                   | SIC + induction + maintenance in both groups | 0.45<br>(0.26, 0.77)* | 0.50<br>(0.33, 0.75)* | 0.64<br>(0.31, 1.34)   | NA                   | 0.16<br>(0.02, 1.29) | 0.59<br>(0.44, 0.80)* | 0.50<br>(0.16, 1.58) § | NA                     | NA | NA |

\*There was significant difference between the two groups; §there is heterogeneity among the studies included in this outcome indicator. *CI* confidence interval, *RR* relative risk, *SIC* single postoperative instillation of intravesical chemotherapy

**Table S2** Subgroup analysis results of intravesical BCG immunotherapy

| Subgroup                |                         | Outcome [RR (95%CI)]  |                         |                       |                      |                        |                      |                      |                      |                       |                      |                         |                       |                         |                        |                       |
|-------------------------|-------------------------|-----------------------|-------------------------|-----------------------|----------------------|------------------------|----------------------|----------------------|----------------------|-----------------------|----------------------|-------------------------|-----------------------|-------------------------|------------------------|-----------------------|
|                         |                         | Recurrence rate       |                         |                       |                      |                        | Progress rate        |                      |                      |                       |                      | Bladder irritation sign | Hematuria             | Cystitis                | Fever                  | Allergy               |
|                         |                         | 1-year                | 2-year                  | 3-year                | 4-year               | 5-year                 | 1-year               | 2-year               | 3-year               | 4-year                | 5-year               |                         |                       |                         |                        |                       |
| BCG instillation time   | ≤ 1 year                | 1.22<br>(0.64, 2.32)  | 0.48<br>(0.30, 0.79)*   | 0.52<br>(0.28, 0.97)* | NA                   | 1.06<br>(0.70, 1.62) § | 0.69<br>(0.20, 2.37) | 0.67<br>(0.21, 2.18) | 0.28<br>(0.06, 1.37) | 0.61<br>(0.33, 1.12)  | 0.84<br>(0.50, 1.39) | 4.69<br>(2.37, 9.31)*   | 2.61<br>(1.75, 3.90)* | 2.81<br>(1.96, 4.04)* § | 8.53<br>(3.76, 19.37)* | 0.44<br>(0.17, 1.13)  |
|                         | > 1 year                | 1.32<br>(0.95, 1.85)  | 0.65<br>(0.36, 1.19) §  | 0.94<br>(0.60, 1.48)  | 1.84<br>(0.73, 4.68) | 0.47<br>(0.34, 0.63)*  | NA                   | 0.25<br>(0.02, 3.87) | NA                   | 0.54<br>(0.27, 1.07)  | 0.78<br>(0.54, 1.12) | 2.12<br>(1.41, 3.19)* § | 1.54<br>(1.30, 1.84)* | 1.57<br>(1.01, 2.42)* § | 3.83<br>(2.06, 7.14)*  | 3.40<br>(0.14, 81.76) |
| BCG dose                | < 80 mg                 | 0.76<br>(0.43, 1.37)  | NA                      | NA                    | NA                   | 0.74<br>(0.60, 0.92)*  | 0.69<br>(0.20, 2.37) | NA                   | NA                   | 0.61<br>(0.33, 1.12)  | 0.84<br>(0.50, 1.39) | NA                      | NA                    | 0.23<br>(0.01, 4.62)    | NA                     | 3.40<br>(0.14, 81.76) |
|                         | 80 – 120 mg             | 1.49<br>(1.19, 1.88)* | 0.60<br>(0.38, 0.96)* § | 0.97<br>(0.66, 1.44)  | NA                   | 0.35<br>(0.18, 0.69)*  | NA                   | 0.58<br>(0.20, 1.70) | NA                   | 0.88<br>(0.19, 4.02)  | NA                   | 2.41<br>(1.36, 4.25)* § | 2.05<br>(1.49, 2.81)* | 3.28<br>(2.15, 5.02)* § | 4.12<br>(2.37, 7.25)*  | NA                    |
|                         | > 120 mg                | NA                    | NA                      | 0.34<br>(0.21, 0.56)* | 1.84<br>(0.73, 4.68) | NA                     | NA                   | NA                   | 0.28<br>(0.06, 1.37) | NA                    | NA                   | 3.67<br>(0.31, 42.80) § | 1.47<br>(1.07, 2.02)* | 2.35<br>(1.65, 3.34)*   | 5.60<br>(3.21, 9.75)*  | NA                    |
| BCG instillation scheme | Induction only          | NA                    | NA                      | NA                    | NA                   | 1.29<br>(0.93, 1.77)   | NA                   | NA                   | NA                   | NA                    | NA                   | NA                      | NA                    | 1.57<br>(1.30, 1.88)*   | NA                     | 0.44<br>(0.17, 1.13)  |
|                         | Induction + maintenance | 1.33<br>(1.05, 1.69)* | 0.60<br>(0.38, 0.97)*   | 0.69<br>(0.44, 1.07)  | 1.84<br>(0.73, 4.68) | 0.56<br>(0.40, 0.78)*  | 0.69<br>(0.20, 2.37) | 0.58<br>(0.20, 1.70) | 0.28<br>(0.06, 1.37) | 0.58<br>(0.36, 0.91)* | 0.80<br>(0.59, 1.07) | 2.41<br>(1.57, 3.69)*   | 1.80<br>(1.46, 2.21)* | 2.71<br>(1.78, 4.12)* § | 4.70<br>(3.09, 7.14)*  | 3.40<br>(0.14, 81.76) |

\*There was significant difference between the two groups; §there is heterogeneity among the studies included in this outcome indicator. *BCG* Bacillus Calmette-Guérin, *CI* confidence interval, *RR* relative risk, *NA* not available

**Table S3** Subgroup analysis results of low dose and standard dose of BCG

| Indicator                 | Instillation scheme        | Studies included | Heterogeneity             |          | HR (95%CI)        |
|---------------------------|----------------------------|------------------|---------------------------|----------|-------------------|
|                           |                            |                  | <i>I</i> <sup>2</sup> (%) | <i>P</i> |                   |
| Recurrence free risk      | Simple induction           | 5                | 0.0                       | 0.812    | 1.40 (0.92, 2.15) |
|                           | Induction plus maintenance | 4                | 0.0                       | 0.942    | 1.20 (1.04, 1.37) |
| Progression free risk     | Simple induction           | 3                | 0.0                       | 0.876    | 1.30 (0.51, 3.31) |
|                           | Induction plus maintenance | 4                | 0.0                       | 0.985    | 1.08 (0.84, 1.38) |
| Total adverse reactions   | Simple induction           | 4                | 54.4                      | 0.087    | 0.53 (0.32, 0.91) |
|                           | Induction plus maintenance | 8                | 68.4                      | 0.002    | 0.66 (0.51, 0.87) |
| Serious adverse reactions | Simple induction           | 3                | 0.0                       | 0.954    | 0.23 (0.04, 1.26) |
|                           | Induction plus maintenance | 3                | 0.0                       | 0.867    | 0.54 (0.37, 0.78) |

*BCG* Bacillus Calmette-Guérin, *CI* confidence interval, *HR* hazard risk

**Table S4** Subgroup analysis results of BCG induction plus maintenance instillation and simple induction instillation

| Indicators                                 | Subgroup         | Studies included       | Heterogeneity      |      | HR/RR (95%CI) |                    |
|--------------------------------------------|------------------|------------------------|--------------------|------|---------------|--------------------|
|                                            |                  |                        | I <sup>2</sup> (%) | P    |               |                    |
| Recurrence survival risk                   | Maintenance time | ≥ 2 years              | 3                  | 14.5 | 0.310         | 0.64 (0.51, 0.80)* |
|                                            |                  | < 2 years              | 7                  | 31.7 | 0.186         | 0.58 (0.40, 0.84)* |
|                                            | Maintenance dose | ≤ 81 mg                | 7                  | 3.7  | 0.398         | 0.61 (0.48, 0.76)* |
|                                            |                  | > 81 mg                | 3                  | 58.5 | 0.090         | 0.61 (0.28, 1.32)* |
|                                            | Risk level       | Intermediate/high-risk | 7                  | 38.0 | 0.139         | 0.59 (0.48, 0.73)* |
|                                            |                  | High-risk              | 3                  | 0.0  | 0.445         | 0.35 (0.20, 0.63)* |
| Progression survival risk                  | Maintenance time | ≥ 2 years              | 3                  | 0.0  | 0.999         | 0.74 (0.57, 0.96)* |
|                                            |                  | < 2 years              | 4                  | 0.0  | 0.741         | 0.54 (0.26, 1.14)* |
|                                            | Maintenance dose | ≤ 81 mg                | 5                  | 0.0  | 0.768         | 0.71 (0.54, 0.93)* |
|                                            |                  | > 81 mg                | 2                  | 0.0  | 0.985         | 0.74 (0.38, 1.46)* |
|                                            | Risk level       | Intermediate/high-risk | 7                  | 0.0  | 0.934         | 0.71 (0.56, 0.92)* |
|                                            |                  | High-risk              | 3                  | 0.0  | 0.712         | 0.67 (0.28, 1.61)* |
| Overall rate of recurrence and progression | Maintenance time | ≥ 2 years              | 3                  | 34.2 | 0.219         | 0.86 (0.71, 1.05)§ |
|                                            |                  | < 2 years              | 9                  | 60.9 | 0.009         | 0.70 (0.47, 1.04)§ |
|                                            | Maintenance dose | ≤ 81 mg                | 7                  | 48.5 | 0.100         | 0.67 (0.47, 0.97)§ |
|                                            |                  | > 81 mg                | 5                  | 60.8 | 0.018         | 0.88 (0.63, 1.22)§ |
|                                            | Risk level       | Intermediate/high-risk | 9                  | 62.3 | 0.007         | 0.72 (0.55, 0.93)§ |
|                                            |                  | High-risk              | 6                  | 27.8 | 0.226         | 0.70 (0.55, 0.89)§ |

\*The index is HR; §the index is RR. BCG Bacillus Calmette-Guérin, CI confidence interval, HR hazard risk, RR relative risk
